# Supplementary material
Source: PubMed Central journal article supplement (PMC2643914)
Supplement: 90489.2008_6.pdf [file 90489.2008_6.pdf]

# Supplementary Material:

## Table B

### Alignment of the N-termini of ATP7B from 24 species

| Species     | #aa<br>N-F37 | Signal                                                                                                                                                                                     | E45-MBD 1 | #aa |
|-------------|--------------|--------------------------------------------------------------------------------------------------------------------------------------------------------------------------------------------|-----------|-----|
| human       | 36           | <u>F</u> A <u>F</u> D <u>N</u> V <u>G</u> Y <u>E</u> -GGLDGL-GPSSQVATSTVRIL---                                                                                                             |           | 20  |
| rat         | 35           | F <u>A</u> F <u>D</u> N <u>V</u> G <u>Y</u> E-GGLDST-CSS-STTTGVVSIL---                                                                                                                     |           | 19  |
| mouse       | 47           | F <u>A</u> F <u>D</u> N <u>V</u> G <u>Y</u> E-GGLDST-SSS-PAATDVVNIL---                                                                                                                     |           | 19  |
| dog         | 4            | F <u>A</u> F <u>D</u> N <u>V</u> G <u>Y</u> E-GGLDSV-CPP-QTATSTISIL---                                                                                                                     |           | 19  |
| sheep-1     | 92           | F <u>A</u> F <u>D</u> N <u>N</u> G <u>Y</u> E-DDLDGV-CPS-QTAAGTISIV---                                                                                                                     |           | 19  |
| sheep-2     | 31           | F <u>A</u> F <u>D</u> N <u>N</u> G <u>Y</u> E-DDLDGV-CPS-QTAAGTISIV---                                                                                                                     |           | 19  |
| monkey      | 36           | F <u>A</u> F <u>D</u> N <u>V</u> G <u>Y</u> E-GGLDGL-GPSSQVDTSTIRIL---                                                                                                                     |           | 20  |
| elephant    | 19*          | F <u>A</u> F <u>D</u> N <u>V</u> G <u>Y</u> E-GSLDSA-SPPSQMATGTVSIL---                                                                                                                     |           | 20  |
| cow         | 92           | F <u>A</u> F <u>D</u> N <u>N</u> G <u>Y</u> E-GGLDGV-RPS-HTATGTINIV---                                                                                                                     |           | 19  |
| horse       | 142**        | F <u>A</u> F <u>D</u> N <u>V</u> G <u>Y</u> E-DSL <del>D</del> GV-CPS-QTSTGTISIL---                                                                                                        |           | 19  |
| Eur.rab     | 19*          | F <u>A</u> F <u>D</u> N <u>V</u> G <u>Y</u> E-GGLDSM-CPS-PTTTGIVSIL---                                                                                                                     |           | 19  |
| cat         | 21*          | F <u>A</u> F <u>D</u> N <u>V</u> G <u>Y</u> E-GGLDSV-CPS-QTTTGTISIS---                                                                                                                     |           | 19  |
| opossum     | 93**         | F <u>S</u> F <u>D</u> N <u>K</u> A <u>F</u> E-GSLHSL-ASL-PISSSSISTSLINIL                                                                                                                   |           | 24  |
| w.h.hog     | 19*          | F <u>A</u> F <u>D</u> N <u>I</u> G <u>Y</u> E-DGLDSL-CHS-QVASSILSIL--                                                                                                                      |           | 19  |
| less h.hog  | 19*          | F <u>A</u> L <u>D</u> N <u>A</u> G <u>Y</u> E-SSENSV-----ATSTVHIV--                                                                                                                        |           | 14  |
| bushbaby    | 19*          | F <u>A</u> F <u>D</u> N <u>I</u> G <u>F</u> E-GSPDGL-CPSPQVATNLIRIW---                                                                                                                     |           | 20  |
| treeshrew   | 19*          | F <u>A</u> F <u>D</u> N <u>I</u> G <u>Y</u> E-DGLDSV-YPSSATATTNISIL---                                                                                                                     |           | 20  |
| guinea pig  | 19*          | F <u>A</u> F <u>D</u> N <u>I</u> G <u>Y</u> E-GGVDSL-CPS-PTVTSTIGIL---                                                                                                                     |           | 19  |
| bat         | 19*          | F <u>A</u> F <u>D</u> N <u>V</u> G <u>Y</u> E-GSLDGM-CPS-ETISGTISIS---                                                                                                                     |           | 19  |
| grd. squir  | 19*          | F <u>A</u> F <u>D</u> N <u>V</u> G <u>Y</u> E-GGLDGM-CPS-QTATGTFSIQ---                                                                                                                     |           | 19  |
| platypus    | 29*          | F <u>A</u> F <u>D</u> N <u>V</u> G <u>Y</u> E-ESLDEL-LPR--ASTGVINIL---                                                                                                                     |           | 18  |
| jungle fowl | 103          | F <u>A</u> F <u>D</u> N <u>M</u> G <u>Y</u> E-ESFEAMPSPSSQERTVAISIL---                                                                                                                     |           | 21  |
| zebrafish   | 73           | <u>H</u> A <u>F</u> <u>D</u> N <u>F</u> G <u>Y</u> E <u>P</u> D <u>G</u> L <u>K</u> H <u>N</u> L <u>V</u> H <u>Q</u> L <u>P</u> S <u>E</u> E <u>G</u> M <u>V</u> K <u>I</u> Q <u>F</u> --- |           | 23  |
| xenopus     | 12*          | <u>C</u> A <u>F</u> <u>D</u> N <u>R</u> G <u>Y</u> E-GSPDDL-CSL-PDDVGSVVVAIQ-                                                                                                              |           | 21  |

**Table B.** \*predicted sequence starts at exon 2, from ENSEMBL database.  
 \*\* predicted sequence from ENSEMBL. The following are from the NCBI protein database: human, GI:55957861; rat, GI:158138532; mouse, GI:148700963; dog, GI:66801769; sheep-1, GI:12643938; sheep-2, GI:2739170; monkey, GI:109120840; cow, GI:119920795; red jungle fowl, GI:118084914; zebrafish, GI:25818313.
