# Supplementary material
Source: PubMed Central journal article supplement (PMC2643914)

**Supplementary Material:  
Figure 1**

**Western Blot Analysis of  
Immunoprecipitated ATP7B**

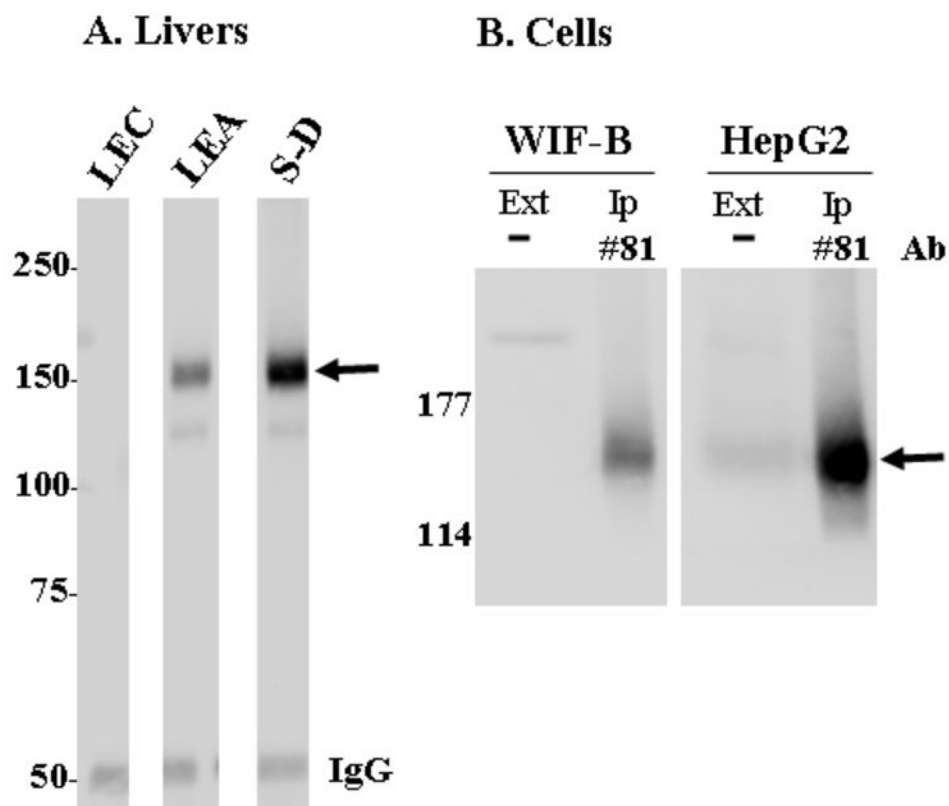

Supplement: 90489.2008_2.pdf [file 90489.2008_2.pdf]
